# Supplementary material for: Dendritic effects of genetically encoded actin-labeling probes in cultured hippocampal neurons
Source: PubMed Central journal article supplement — Mol Biol Cell. 2023 Jun 1;34(7):br8. doi: 10.1091/mbc.E22-08-0331 (PMC10295473; doi:10.1091/mbc.e22-08-0331), 2023-06-01

Supplementary Materials  
*Molecular Biology of the Cell*  
Ignácz *et al.*

**Supplementary Figure 1.** Expression level dependency in the investigated morphometric parameters in dendritic spines. (A) 60sec filopodial motility and (B) total protrusion density plotted against soma GFP intensity. Circles represent individual filopodia. (C) Length and (D) Head/neck diameter ratio of dendritic spines in relation to soma GFP intensity. Box-whisker plots represent data from individual cells. Correlation was calculated from the median values of each cell.

P values show Pearson correlation significance.

\*\*p<0.01 \*\*\*p<0.001.

**Supplementary Figure 2.** Workflow of machine learning based image analysis methods used in the present work. (A) Sholl analysis, dendritic endpoints and skeleton finding. Original and thresholded images are shown in inverted fluorescence, measured properties are shown in red. Scalebar: 50  $\mu\text{m}$ . (B) Dendritic spine morphometric measurements. Original image is shown in inverted fluorescence, the segmentation categories are written in their corresponding colors in the images. Scalebar: 2  $\mu\text{m}$ . (C) Quantification of fluorescence enrichment in dendritic spines. Original image is shown in inverted fluorescence, the segmentation categories are written in their corresponding colors in the images. Scalebar: 2  $\mu\text{m}$ .

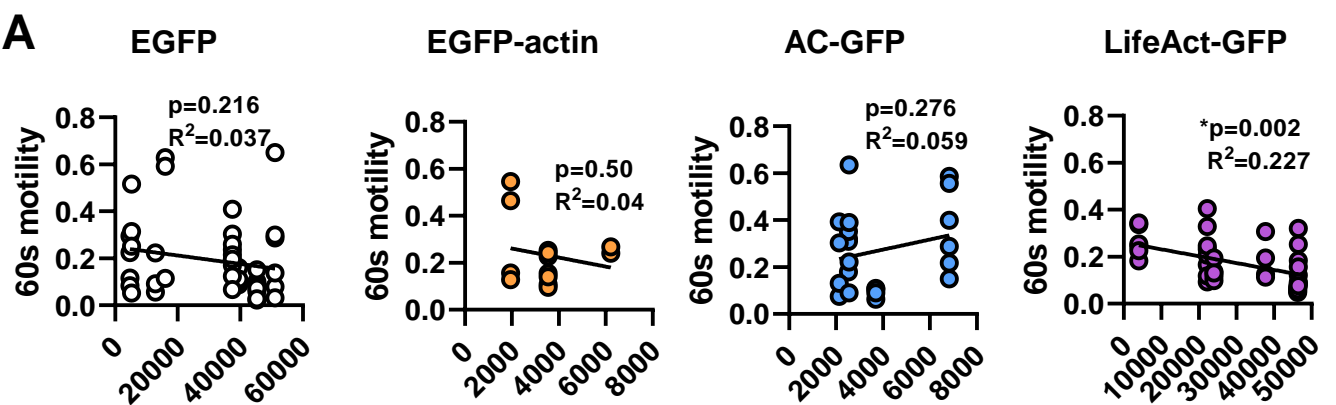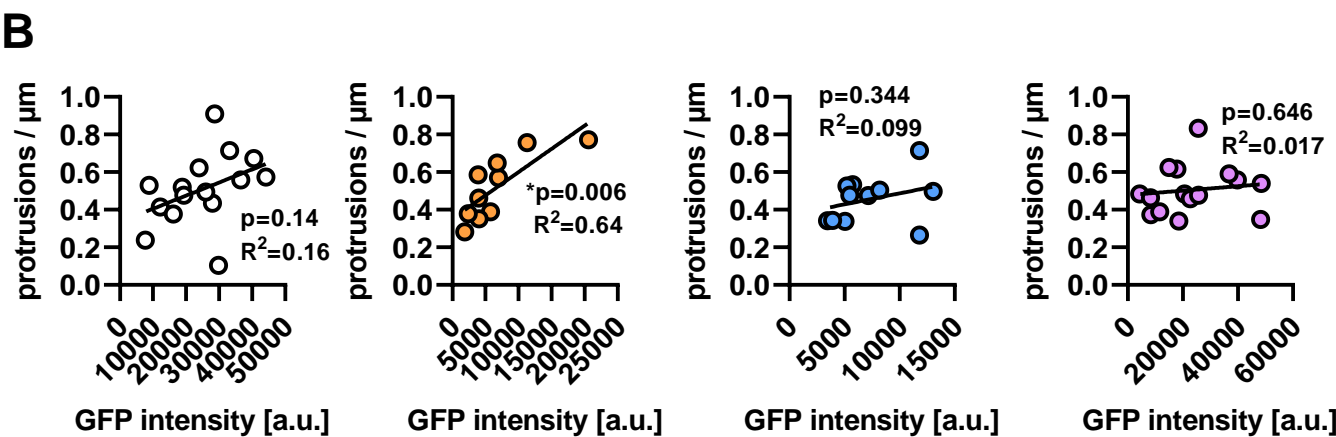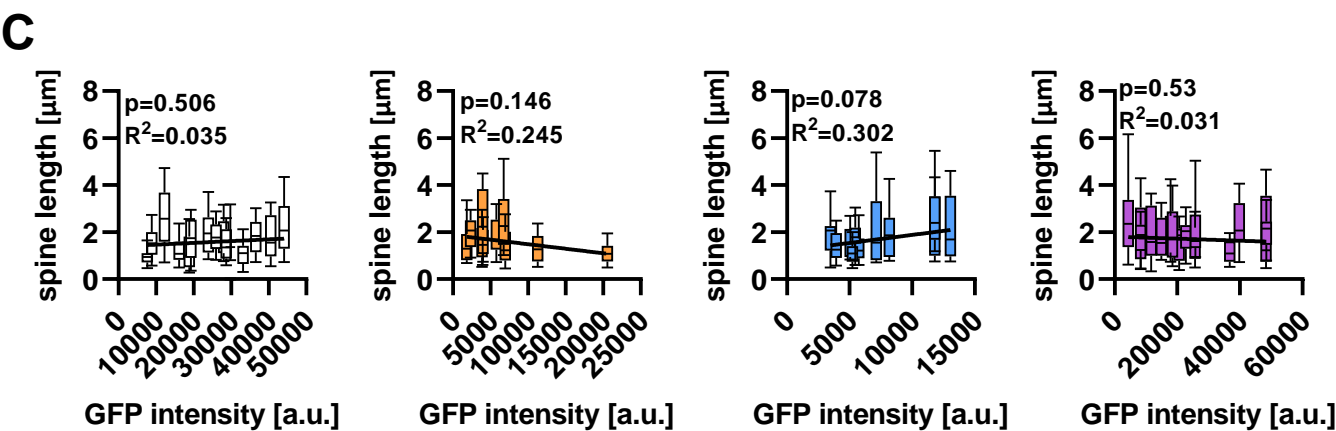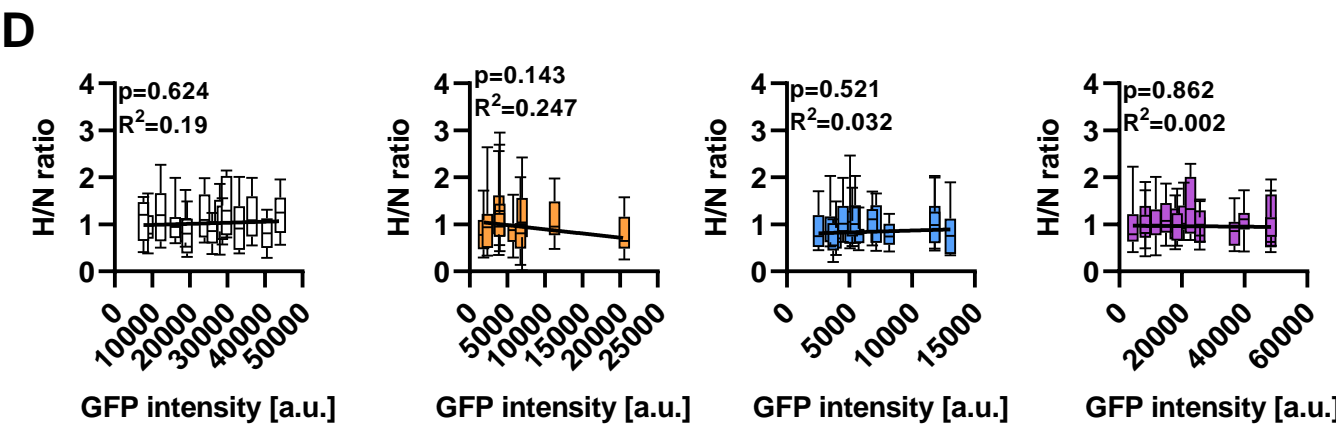

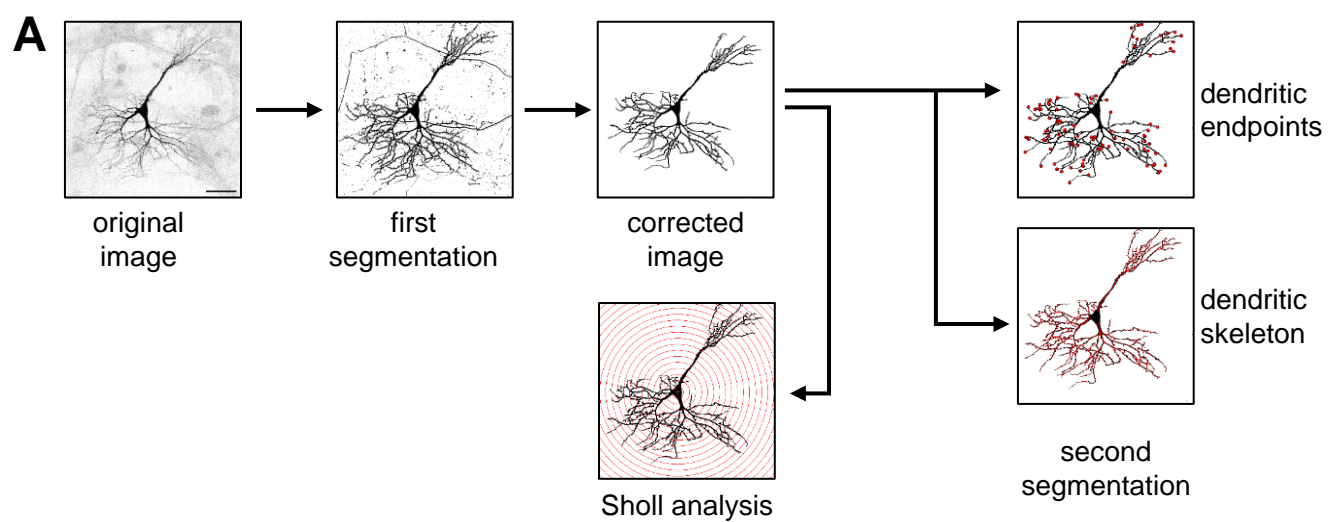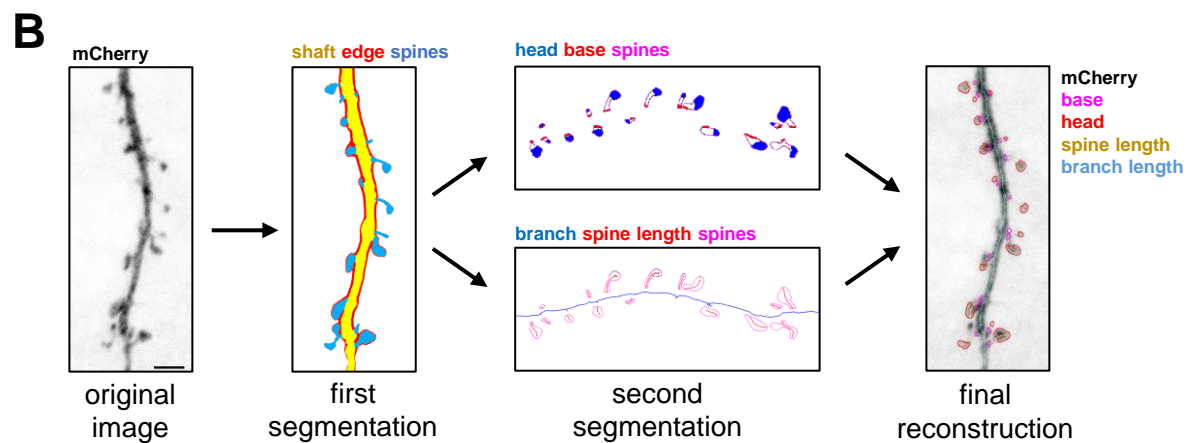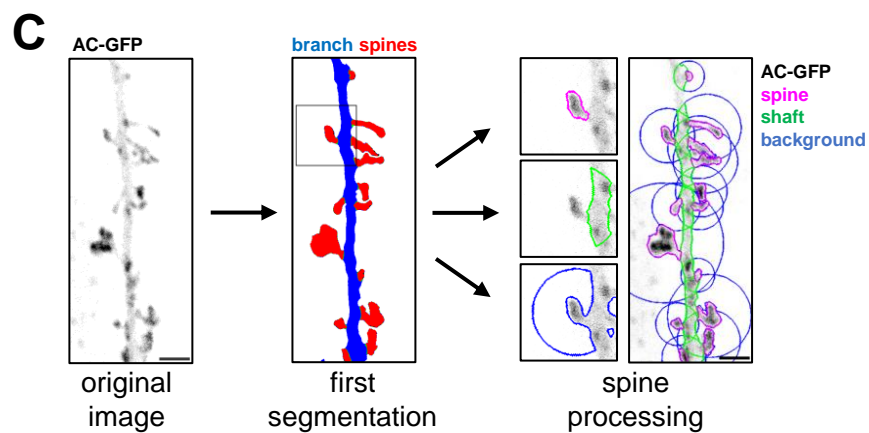

Supplement: mbc-34-br8-s001.pdf [file mbc-34-br8-s001.pdf]
